# Supplementary material for: Solid-state structure, solution-state behaviour and catalytic activity of electronically divergent C,N-chelating palladium–N-heterocyclic carbene complexes
Source: Royal Society of Chemistry journal article supplement (doi:10.1039/c5dt02194d), 2015-01-01
Supplement: c5dt02194d1.pdf [file c5dt02194d1.pdf]

**Solid-state structure, solution-state behaviour and catalytic  
activity of electronically divergent C, N-chelating palladium-N-  
heterocyclic carbene complexes**

**Electronic Supporting Information**

Michael R. Chapman, Benjamin R. M. Lake, Christopher M. Pask, Bao N. Nguyen and Charlotte E.

Willans\*

*School of Chemistry, University of Leeds, Woodhouse Lane, Leeds, LS2 9JT, UK.*

*E-mail: [c.e.willans@leeds.ac.uk](mailto:c.e.willans@leeds.ac.uk)*

**Table of Contents**

1. [General considerations](#)
2. [Preparation of imidazolium salts](#)
3. [<sup>1</sup>H NMR spectra of imidazolium salts](#)
4. [Ligand exchange studies](#)
5. [Crystallographic details](#)
6. [References](#)

## 1. General Considerations

Where stated, manipulations were performed under an atmosphere of dry nitrogen by means of standard Schlenk line or Glovebox techniques. Anhydrous solvents were prepared by passing the solvent over activated alumina to remove water, copper catalyst to remove oxygen and molecular sieves to remove any remaining water, *via* the Dow-Grubbs solvent system. Deuterated chloroform and acetonitrile were dried over  $\text{CaH}_2$ , cannula filtered or distilled, and then freeze-pump-thaw degassed prior to use. All other reagents and solvents were used as supplied.

$^1\text{H}$  and  $^{13}\text{C}$  NMR spectra were recorded on a Bruker DPX300 spectrometer or a Bruker AV500 spectrometer. The values of chemical shifts are given in ppm and values for coupling constants ( $J$ ) in Hz. Assignment of some  $^1\text{H}$  NMR spectra was aided by the use of 2D  $^1\text{H}^1\text{H}$  COSY experiments and the assignment of some  $^{13}\text{C}\{^1\text{H}\}$  NMR spectra was aided by  $^{13}\text{C}\{^1\text{H}\}$  dept 135 experiments. Mass spectra were collected on a Bruker Daltonics (micro TOF) instrument operating in the electrospray mode. Microanalyses were performed using a Carlo Erba Elemental Analyser MOD 1106 spectrometer. GC analyses were performed using a Bruker 430-GC equipped with a CP-8400 autosampler and a BR-5 column (30 m x 0.25 mm (ID) x 0.25  $\mu\text{m}$  film thickness) with carrier gas flow rate of 2.0  $\text{mL}\cdot\text{min}^{-1}$  and a temperature ramp from 50 to 310  $^\circ\text{C}$  at 20  $^\circ\text{C}\cdot\text{min}^{-1}$ . The injection volume was 5  $\mu\text{L}$  with a split ratio of 10. The response factors for the internal standard, substrate and product were calculated using an appropriate calibration for this GC and column.

## 2. Preparation of imidazolium salts

**General allylation procedure.** 2-(1-Imidazol)-pyridine derivative (5.0 mmol), allyl bromide (2.0 mL, 23 mmol) and acetonitrile (40 mL) were added to a small round-bottomed flask and heated at reflux for 16 hours. After this time, the mixture was cooled to room temperature and the volume of solvent reduced *in vacuo* (to approx. 10 mL). Slow addition of diethyl ether (35 mL) to the stirring acetonitrile solution led to the precipitation of the product as an off-white crystalline solid, which was collected by vacuum filtration, washed repeatedly with diethyl ether and dried *in vacuo*.

**General salt metathesis procedure.** 1-Allyl-3-(2-pyridyl)imidazolium bromide derivative (2.00 mmol), ammonium hexafluorophosphate (0.98 g, 6.0 mmol) and water (40 mL) were added to a round-bottomed flask and stirred at room temperature for 2 hours. After this time, an off-white crystalline solid had developed which was isolated *via* vacuum filtration and washed with water (3 x 30 mL) followed by aliquots of cold diethyl ether (3 x 30 mL) and dried *in vacuo*.

**1-Allyl-3-(2-pyridyl)imidazolium bromide (1a).** 2-(Imidazole-1-yl)pyridine<sup>1</sup> (0.72 g, 5.0 mmol) was reacted according to the general allylation procedure (*vide supra*). Yield: 1.18 g, 4.45 mmol, 89 %. <sup>1</sup>H NMR (300 MHz, CDCl<sub>3</sub>): δ (ppm) 11.74 (s, 1H, NCHN), 8.57 – 8.47 (m, 2H, pyH), 8.32 (t, *J* = 1.7 Hz, 1H, imH), 8.08 – 7.98 (m, 1H, pyH), 7.52 (t, *J* = 1.7 Hz, 1H, imH), 7.48 – 7.42 (m, 1H, pyH), 6.12 (ddt, *J* = 16.8, 10.1, 6.5 Hz, 1H, CH=CH<sub>2</sub>), 5.57 (d, *J* = 16.8 Hz, 1H, HC=CHH<sub>trans</sub>), 5.51 (dd, *J* = 10.1, 0.6 Hz, 1H, HC=CHH<sub>cis</sub>), 5.24 (d, *J* = 6.5 Hz, 2H, NCH<sub>2</sub>). <sup>13</sup>C{<sup>1</sup>H} NMR (75 MHz, CDCl<sub>3</sub>): δ (ppm) 149.1, 146.1, 140.8, 136.0, 129.7, 125.3, 123.5, 122.0, 119.1, 115.2, 52.8. HR-MS (ESI<sup>+</sup>): *m/z* 186.1030 [C<sub>11</sub>H<sub>12</sub>N<sub>3</sub>]<sup>+</sup>, calcd. [M – Br]<sup>+</sup> 186.1026. These data are in agreement with those reported in the literature.<sup>2</sup>

**1-Allyl-3-(2-(4-methyl)pyridyl)imidazolium bromide (1b).** 2-(Imidazole-1-yl)-4-methylpyridine<sup>3</sup> (0.80 g, 5.0 mmol) was reacted according to the general allylation procedure (*vide supra*). Yield: 1.25 g, 4.46 mmol, 89 %. <sup>1</sup>H NMR (300 MHz, CDCl<sub>3</sub>): δ (ppm) 11.34 (s, 1H, NCHN), 8.42 – 8.21 (m, 3H, pyH, imH), 7.67 (s, 1H, imH), 7.20 (d, *J* = 4.9 Hz, 1H, pyH), 6.09 (ddt, *J* = 16.9, 10.1, 6.5 Hz, 1H, CH=CH<sub>2</sub>), 5.56 (d, *J* = 16.9 Hz, 1H, CH=CHH<sub>trans</sub>), 5.44 (d, *J* = 10.1 Hz, 1H, CH=CHH<sub>cis</sub>), 5.21 (d, *J*

= 6.5 Hz, 2H, NCH<sub>2</sub>), 2.48 (s, 3H, CH<sub>3</sub>). <sup>13</sup>C{<sup>1</sup>H} NMR (75 MHz, CDCl<sub>3</sub>) δ (ppm) 152.9, 148.6, 146.1, 135.2, 129.8, 126.2, 123.2, 122.5, 119.2, 115.5, 52.6, 21.3. HR-MS (ESI<sup>+</sup>): *m/z* 200.1180 [C<sub>12</sub>H<sub>14</sub>N<sub>3</sub>]<sup>+</sup>, calcd. [M – Br]<sup>+</sup> 200.1182. These data are in agreement with those reported in the literature.<sup>2</sup>

**1-Allyl-3-(2-(5-nitro)pyridyl)imidazolium bromide (1c).** 2-(Imidazole-1-yl)-5-nitropyridine<sup>4</sup> (0.95 g, 5.0 mmol) was reacted according to the general allylation procedure (*vide supra*). Yield: 1.37 g, 4.43 mmol, 86 %. <sup>1</sup>H NMR (300 MHz, CDCl<sub>3</sub>): δ (ppm) 12.22 (s, 1H, NCHN), 9.34 (d, *J* = 2.4 Hz, 1H, pyH), 9.12 (d, *J* = 9.0 Hz, 1H, pyH), 8.84 (dd, *J* = 9.0, 2.4 Hz, 1H, pyH), 8.42 (t, *J* = 1.8 Hz, 1H, imH), 7.51 (t, *J* = 1.8 Hz, 1H, imH), 6.15 (m, 1H, CH=CH<sub>2</sub>), 5.64 (d, *J* = 16.7 Hz, 1H, CH=CHH<sub>trans</sub>), 5.58 (d, *J* = 10.2 Hz, 1H, CH=CHH<sub>cis</sub>), 5.22 (d, *J* = 6.6 Hz, 2H, NCH<sub>2</sub>). <sup>13</sup>C{<sup>1</sup>H} NMR (75 MHz, CDCl<sub>3</sub>): δ (ppm) 149.2, 145.1, 144.6, 137.0, 136.3, 129.3, 124.1, 123.0, 119.6, 116.2, 53.1. HR-MS (ESI<sup>+</sup>): *m/z* 231.0880 [C<sub>11</sub>H<sub>11</sub>N<sub>4</sub>O<sub>2</sub>]<sup>+</sup>, calcd. [M – Br]<sup>+</sup> 231.0877. These data are in agreement with those reported in the literature.<sup>2</sup>

**1-Allyl-3-(2-(4-methoxy)pyridyl)imidazolium bromide (1d).** 2-(Imidazole-1-yl)-4-methoxypyridine<sup>5</sup> (0.88 g, 5.0 mmol) was reacted according to the general allylation procedure (*vide supra*). Yield: 1.24 g, 4.20 mmol, 84 %. <sup>1</sup>H NMR (300 MHz, CDCl<sub>3</sub>) δ (ppm) 11.81 (s, 1H, NCHN), 8.29 (s, 1H, imH), 8.22 (d, *J* = 5.8 Hz, 1H, pyH), 8.19 (d, *J* = 3.0 Hz, 1H, pyH), 7.51 (s, 1H, imH), 6.90 (dd, *J* = 5.8, 3.0 Hz, 1H, pyH), 6.14 (ddt, *J* = 16.8, 10.1, 6.5 Hz, 1H, CH=CH<sub>2</sub>), 5.66 (d, *J* = 16.8 Hz, 1H, CH=CHH<sub>trans</sub>), 5.55 (d, *J* = 10.1 Hz, 1H, CH=CHH<sub>cis</sub>), 5.14 (d, *J* = 6.5 Hz, 2H, NCH<sub>2</sub>), 4.10 (s, 3H, OCH<sub>3</sub>). <sup>13</sup>C{<sup>1</sup>H} NMR (75 MHz, CDCl<sub>3</sub>): δ (ppm) 169.3, 150.0, 147.8, 136.1, 129.7, 123.3, 121.7, 119.4, 113.9, 100.1, 58.0, 52.9. HR-MS (ESI<sup>+</sup>): *m/z* 216.1161 [C<sub>12</sub>H<sub>14</sub>N<sub>3</sub>O]<sup>+</sup>, calcd. [M – Br]<sup>+</sup> 216.1131. These data are in agreement with those reported in the literature.<sup>2</sup>

**1-Allyl-3-(2-methylpyridyl)imidazolium bromide (1e).** 2-Bromomethylpyridine hydrobromide (0.51 g, 2.00 mmol), 1-allylimidazole (0.23 g, 2.1 mmol) and potassium carbonate (1.40 g, 10.00 mmol) were charged to a round-bottomed flask and stirred vigorously in acetonitrile (30 mL) at 60 °C for 18 hours. After this time, the mixture was filtered and solvents removed *in vacuo* to furnish a pale orange oil. Dissolution in acetonitrile (20 mL) followed by reprecipitation with diethyl ether (50 mL)

(twice) delivered the pure product as a pale yellow oil. Yield: 0.25 g, 2.00 mmol, quantitative.  $^1\text{H}$  NMR (400 MHz,  $\text{CDCl}_3$ ):  $\delta$  (ppm) 10.92 (s, 1H, NCHN), 8.55 (d,  $J = 4.0$  Hz, 1H, imH), 7.87 (d,  $J = 8.0$  Hz, 1H, meta-CH), 7.76 (td,  $J = 8.0$  Hz, 1H, para-CH), 7.63 (d,  $J = 4.0$  Hz, 1H, imH), 7.30 (td,  $J = 8.0$  Hz, 1H, meta'-CH), 7.16 (d,  $J = 8.0$  Hz, 1H, ortho-CH), 6.02 (m, 1H,  $\text{CH}_2=\text{CHC}$ ), 5.79 (s, 2H,  $\text{CH}_2$ ), 5.49 (d,  $J = 12.0$  Hz, 2H,  $\text{CH}_2=\text{CH}$ ), 4.92 (d,  $J = 3.0$  Hz, 2H,  $\text{NCH}_2$ ).  $^{13}\text{C}\{^1\text{H}\}$  NMR (100 MHz,  $\text{CDCl}_3$ ):  $\delta$  (ppm) 152.5, 150.0, 137.9, 137.6, 129.6, 124.3, 124.2, 123.1, 121.3, 110.1, 54.2, 52.4. HR-MS (ESI<sup>+</sup>):  $m/z$  200.1202 [ $\text{C}_{12}\text{H}_{14}\text{N}_3$ ]<sup>+</sup>, calcd.  $[\text{M} - \text{Br}]^+$  200.1182. These data are in agreement with those reported in the literature.<sup>2</sup>

**1,3-Bis(2-methylpyridyl)imidazolium bromide (1f).** 2-Bromomethylpyridine (1.20 g, 4.74 mmol), imidazole (0.21 g, 3.10 mmol) and potassium carbonate (1.65 g, 11.9 mmol) were charged to a round-bottomed flask and stirred vigorously in acetonitrile (50 mL) at 60 °C for 24 hours. After this time, the mixture was filtered and solvents removed *in vacuo* to give a crude brown oil. The residue was dissolved in acetonitrile (30 mL) followed by reprecipitation with diethyl ether (60 mL) (twice) to furnish a light brown oil, which was further washed with diethyl ether (3 x 30 mL) and dried *in vacuo* to afford spectroscopically pure title compound as a light-brown solid. Yield: 0.64 g, 2.00 mmol, 84 %.  $^1\text{H}$  NMR (300 MHz,  $\text{CDCl}_3$ ):  $\delta$  (ppm) 10.95 (br s, 1H, NCHN), 8.56 (d,  $J = 3.0$  Hz, 2H, imH), 7.78 – 7.75 (m, 4H, pyCH), 7.54 (br s, 2H, imH), 7.31 (td,  $J = 6.0$  Hz, 2H, meta-CH), 5.67 (s, 4H,  $\text{CH}_2$ ).  $^{13}\text{C}\{^1\text{H}\}$  NMR (100 MHz,  $\text{CDCl}_3$ ):  $\delta$  (ppm) 152.3, 149.9, 137.8, 137.5, 124.1, 124.0, 122.4, 54.15. HR-MS (ESI<sup>+</sup>):  $m/z$  251.1297 [ $\text{C}_{15}\text{H}_{15}\text{N}_4$ ]<sup>+</sup>, calcd.  $[\text{M} - \text{Br}]^+$  251.1291. Anal. calcd. (%) for  $\text{C}_{15}\text{H}_{15}\text{N}_4\text{Br}$ : C 54.39, H 4.61, N 16.92; found C 54.00, H 5.00, N 16.90.

**1-Allyl-3-(2-pyridyl)imidazolium hexafluorophosphate (2a).** 1-Allyl-3-(2-pyridyl)imidazolium bromide (0.53 g, 2.0 mmol) was reacted according to the general salt metathesis reaction (*vide supra*). Yield: 0.66 g, 2.00 mmol, quantitative.  $^1\text{H}$  NMR (300 MHz,  $\text{CD}_3\text{CN}$ ):  $\delta$  (ppm) 9.28 (s, 1H, NCHN), 8.61 (d,  $J = 4.8$  Hz, 1H, imH), 8.34 – 8.08 (m, 2H, pyH), 7.75 (d,  $J = 9.0$  Hz, 1H, pyH), 7.07 (d,  $J = 4.8$  Hz, 1H, imH), 7.58 – 7.56 (m, 1H, pyH), 6.16 (ddt,  $J = 15.9, 9.0, 1.5$  Hz, 1H,  $\text{CH}=\text{CH}_2$ ), 5.51 (d,  $J = 15.9$  Hz, 1H,  $\text{HC}=\text{CHH}_{\text{trans}}$ ), 5.47 (dd,  $J = 6.6, 0.9$  Hz, 1H,  $\text{HC}=\text{CHH}_{\text{cis}}$ ), 4.89 (d,  $J = 6.5$  Hz, 2H,  $\text{NCH}_2$ ).  $^{13}\text{C}\{^1\text{H}\}$  NMR (75 MHz,  $\text{CD}_3\text{CN}$ ):  $\delta$  (ppm) 150.7, 148.1, 142.3, 136.0, 128.1, 125.2, 123.3,

120.9, 118.8, 115.1, 52.3. HR-MS (ESI<sup>+</sup>):  $m/z$  186.1020 [C<sub>11</sub>H<sub>12</sub>N<sub>3</sub>]<sup>+</sup>, calcd. [M – PF<sub>6</sub>]<sup>+</sup> 186.1026. Anal. calcd. (%) for C<sub>11</sub>H<sub>12</sub>N<sub>3</sub>PF<sub>6</sub>·<sup>2</sup>/<sub>3</sub>CH<sub>2</sub>Cl<sub>2</sub>: C 35.97, H 3.46, N 10.80; found C 35.70, H 3.20, N 11.20.

**1-Allyl-3-(2-(4-methyl)pyridyl)imidazolium hexafluorophosphate (2b).** 1-Allyl-3-(2-(4-methyl)pyridyl)imidazolium bromide (0.56 g, 2.0 mmol) was reacted according to the general salt metathesis reaction (*vide supra*). Yield: 0.65 g, 1.88 mmol, 94 %. <sup>1</sup>H NMR (300 MHz, CD<sub>3</sub>CN)  $\delta$  (ppm) 9.26 (br s, 1H, NCHN), 8.44 (d,  $J$  = 5.1 Hz, 1H, pyH), 8.07 (br t,  $J$  = 3.0, 1.5 Hz, 1H, imH), 7.61 (br s, 1H, pyH), 7.57 (br t,  $J$  = 3.0, 1.5 Hz, 1H, imH), 7.42 (br d,  $J$  = 5.1 Hz, 1H, pyH), 6.08 (ddt,  $J$  = 18.1, 10.1, 6.5 Hz, 1H, CH=CH<sub>2</sub>), 5.47 (d,  $J$  = 18.1 Hz, 1H, CH=CHH<sub>trans</sub>), 4.89 (d,  $J$  = 10.1 Hz, 1H, CH=CHH<sub>cis</sub>), 2.50 (s, 3H, CH<sub>3</sub>). <sup>13</sup>C{<sup>1</sup>H} NMR (75 MHz, CD<sub>3</sub>CN)  $\delta$  (ppm) 149.9, 148.0, 135.0, 131.3, 127.2, 124.4, 122.5, 120.5, 118.6, 115.5, 53.1, 21.2. HR-MS (ESI<sup>+</sup>):  $m/z$  200.1163 [C<sub>12</sub>H<sub>14</sub>N<sub>3</sub>]<sup>+</sup>, calcd. [M – PF<sub>6</sub>]<sup>+</sup> 200.1182. Anal. calcd. (%) for C<sub>12</sub>H<sub>14</sub>N<sub>3</sub>PF<sub>6</sub>·CH<sub>2</sub>Cl<sub>2</sub>: C 36.30, H 3.75, N 9.91; found C 36.25, H 3.50, N 10.10.

**1-Allyl-3-(2-(5-nitro)pyridyl)imidazolium hexafluorophosphate (2c).** 1-Allyl-3-(2-(5-nitro)pyridyl)imidazolium bromide (0.62 g, 2.0 mmol) was reacted according to the general salt metathesis reaction (*vide supra*). Yield: 0.74 g, 1.96 mmol, 98 %. <sup>1</sup>H NMR (300 MHz, CD<sub>3</sub>CN)  $\delta$  (ppm) 9.23 (br s, 1H, NCHN), 9.22 (br s, 1H, pyH), 8.72 (d,  $J$  = 8.1 Hz, 1H, imH), 8.07 (s, 1H, pyH), 7.87 (d,  $J$  = 8.1 Hz, 1H, imH), 7.51 (br s, 1H, pyH), 6.08 – 5.91 (m, 1H, CH=CH<sub>2</sub>), 5.41 (d,  $J$  = 6.3 Hz, 1H, CH=CHH<sub>trans</sub>), 5.35 (br s, 1H, CH=CHH<sub>cis</sub>), 4.81 (br d,  $J$  = 5.7 Hz, 2H, NCH<sub>2</sub>). <sup>13</sup>C{<sup>1</sup>H} NMR (75 MHz, CD<sub>3</sub>CN):  $\delta$  (ppm) 150.4, 146.3, 145.9, 137.2, 136.1, 130.9, 125.0, 123.0, 121.0, 115.8, 53.5. HR-MS (ESI<sup>+</sup>):  $m/z$  231.0888 [C<sub>11</sub>H<sub>11</sub>N<sub>4</sub>O<sub>2</sub>]<sup>+</sup>, calcd. [M – PF<sub>6</sub>]<sup>+</sup> 231.0877. Anal. calcd. (%) for C<sub>11</sub>H<sub>11</sub>N<sub>4</sub>O<sub>2</sub>PF<sub>6</sub>·<sup>1</sup>/<sub>2</sub>H<sub>2</sub>O: C 34.30, H 3.14, N 14.54; found C 34.15, H 2.80, N 14.20.

**1-Allyl-3-(2-(4-methoxy)pyridyl)imidazolium hexafluorophosphate (2d).** 1-Allyl-3-(2-(4-methoxy)pyridyl)imidazolium bromide (0.56 g, 2.00 mmol) was reacted according to the general salt metathesis reaction (*vide supra*). Yield: 0.72 g, 2.00 mmol, quantitative. <sup>1</sup>H NMR (300 MHz, CD<sub>3</sub>CN)  $\delta$  9.28 (s, 1H, NCHN), 8.39 (d,  $J$  = 6.0 Hz, 1H, pyrH), 8.10 (br t,  $J$  = 3.9, 1.8 Hz, 1H, imH), 7.56 (br t,  $J$  = 3.9, 1.8 Hz, 1H, imH), 7.26 (d,  $J$  = 2.1 Hz, 1H, pyrH), 7.11 (dd,  $J$  = 5.7, 2.1 Hz, 1H, pyrH), 6.16 –

6.02 (ddt,  $J = 17.7, 12.6, 6.3$  Hz, 1H, CH=CH<sub>2</sub>), 5.50 (d,  $J = 17.7$  Hz, 1H, CH=CHH<sub>trans</sub>), 5.45 (d,  $J = 12.6$  Hz, 1H, CH=CHH<sub>cis</sub>), 4.88 (d,  $J = 6.3$  Hz, 2H, NCH<sub>2</sub>), 3.98 (s, 3H, OCH<sub>3</sub>) ppm. <sup>13</sup>C{<sup>1</sup>H} NMR (75 MHz, CD<sub>3</sub>CN):  $\delta$  169.7, 151.3, 149.0, 135.4, 131.4, 124.2, 122.5, 120.6, 112.6, 101.4, 57.5, 53.3 ppm. HR-MS (ESI<sup>+</sup>): Calcd for C<sub>12</sub>H<sub>14</sub>N<sub>3</sub>O [M-PF<sub>6</sub>]<sup>+</sup>: 216.1131. Found: 216.1149.

**1,3-Bis(2-methylpyridyl)imidazolium hexafluorophosphate (2f).** 1,3-Bis(2-methylpyridyl)imidazolium bromide (0.66 g, 2.0 mmol) was reacted according to the general salt metathesis reaction (*vide supra*). Yield: 0.75 g, 1.90 mmol, 95 %. <sup>1</sup>H NMR (300 MHz, CD<sub>3</sub>CN):  $\delta$  (ppm) 8.82 (br s, 1H, NCHN), 8.62 (dd,  $J = 5.7, 1.8$  Hz, 2H, imH), 8.06 (td,  $J = 15.6, 7.8, 1.8$  Hz, 2H, pyH), 7.59 – 7.55 (m, 4H, pyH), 7.52 (d,  $J = 1.8$  Hz, 2H, pyH), 5.55 (s, 4H, CH<sub>2</sub>). <sup>13</sup>C{<sup>1</sup>H} NMR (100 MHz, CD<sub>3</sub>CN):  $\delta$  (ppm) 152.3, 149.0, 141.5, 138.4, 126.0, 125.0, 124.5, 53.7. HR-MS (ESI<sup>+</sup>):  $m/z$  251.1288 [C<sub>15</sub>H<sub>15</sub>N<sub>4</sub>]<sup>+</sup>, calcd. [M – PF<sub>6</sub>]<sup>+</sup> 251.1291. These data are in agreement with those reported in the literature.<sup>6</sup>

### 3. $^1\text{H}$ NMR spectra of imidazolium salts

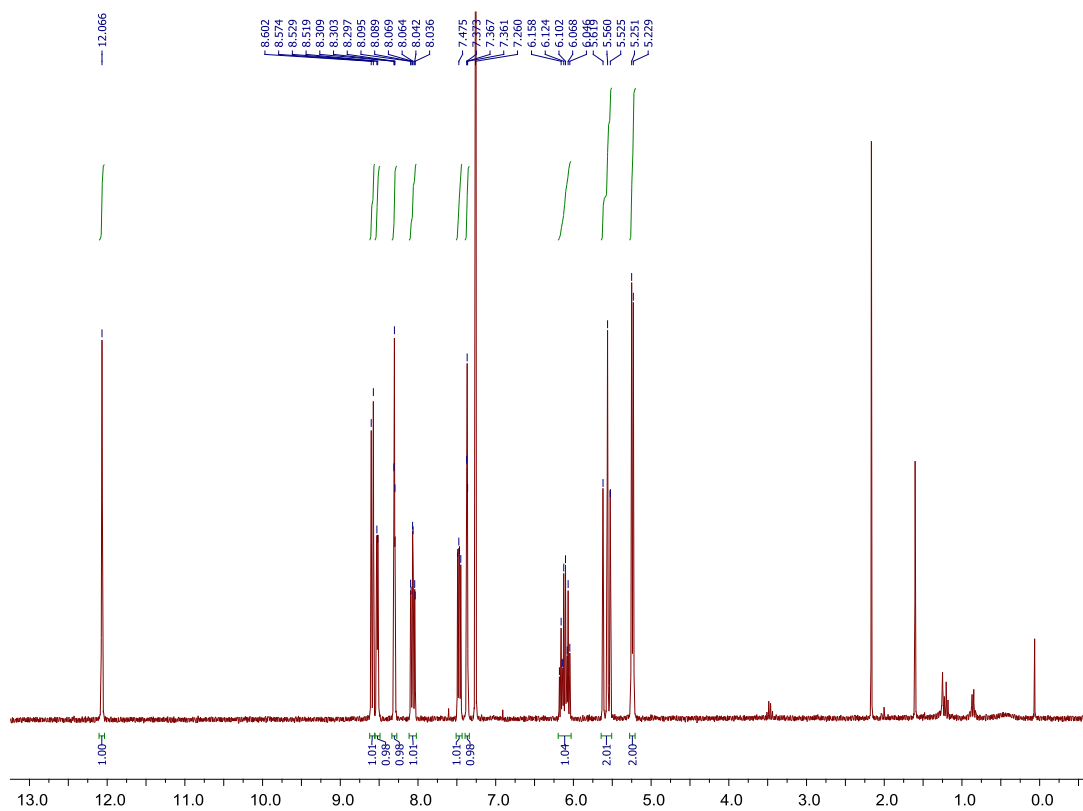

Figure 1.  $^1\text{H}$  NMR spectrum of 1-allyl-3-(2-pyridyl)imidazolium bromide (**1a**).

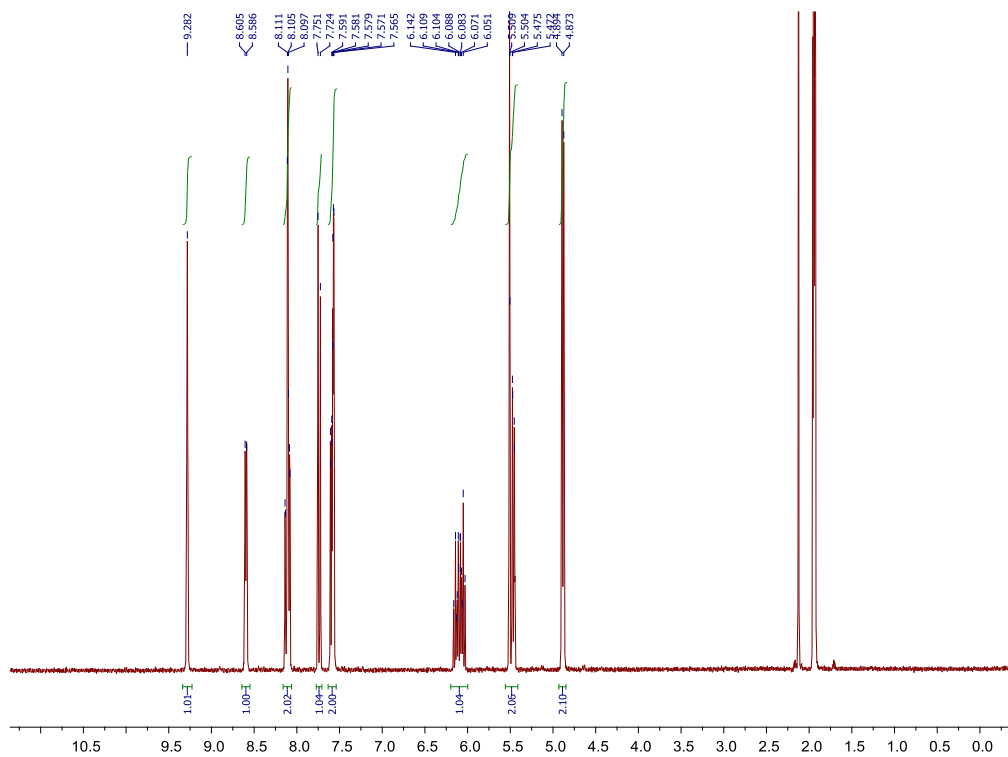

Figure 2.  $^1\text{H}$  NMR spectrum of 1-allyl-3-(2-pyridyl)imidazolium hexafluorophosphate (**2a**).



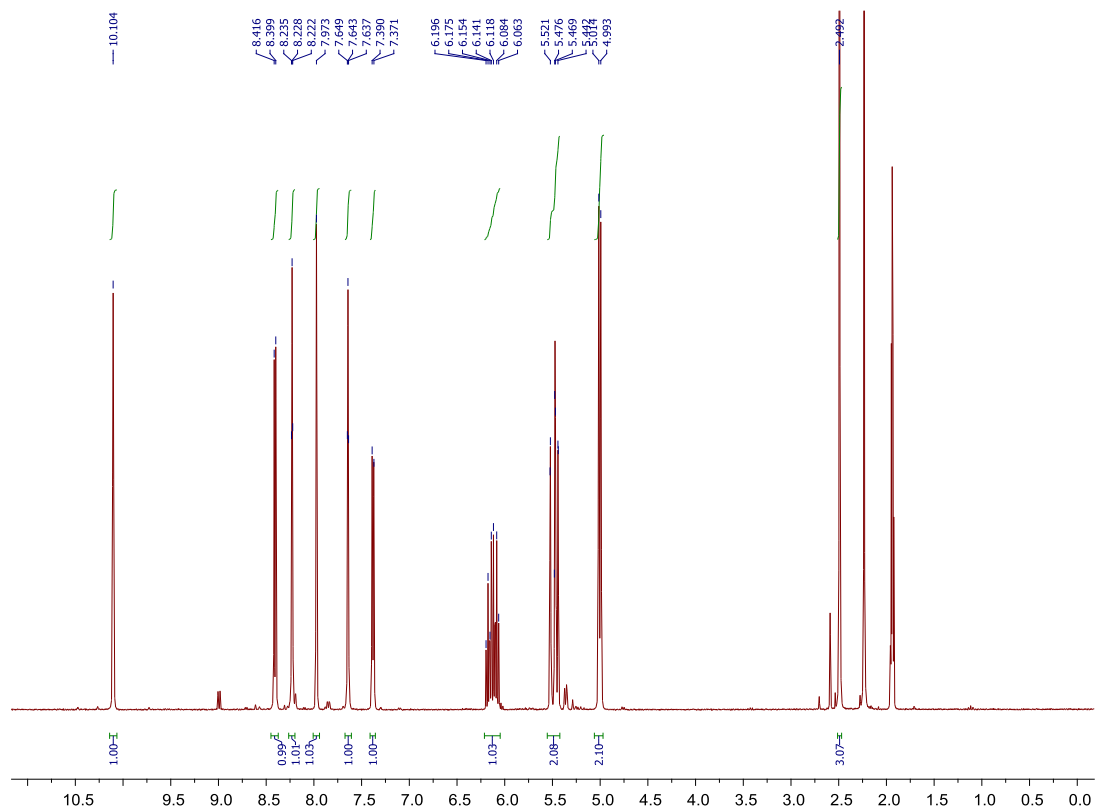

Figure 3.  $^1\text{H}$  NMR spectrum of 1-allyl-3-(2-(4-methyl)pyridyl)imidazolium bromide (**1b**).

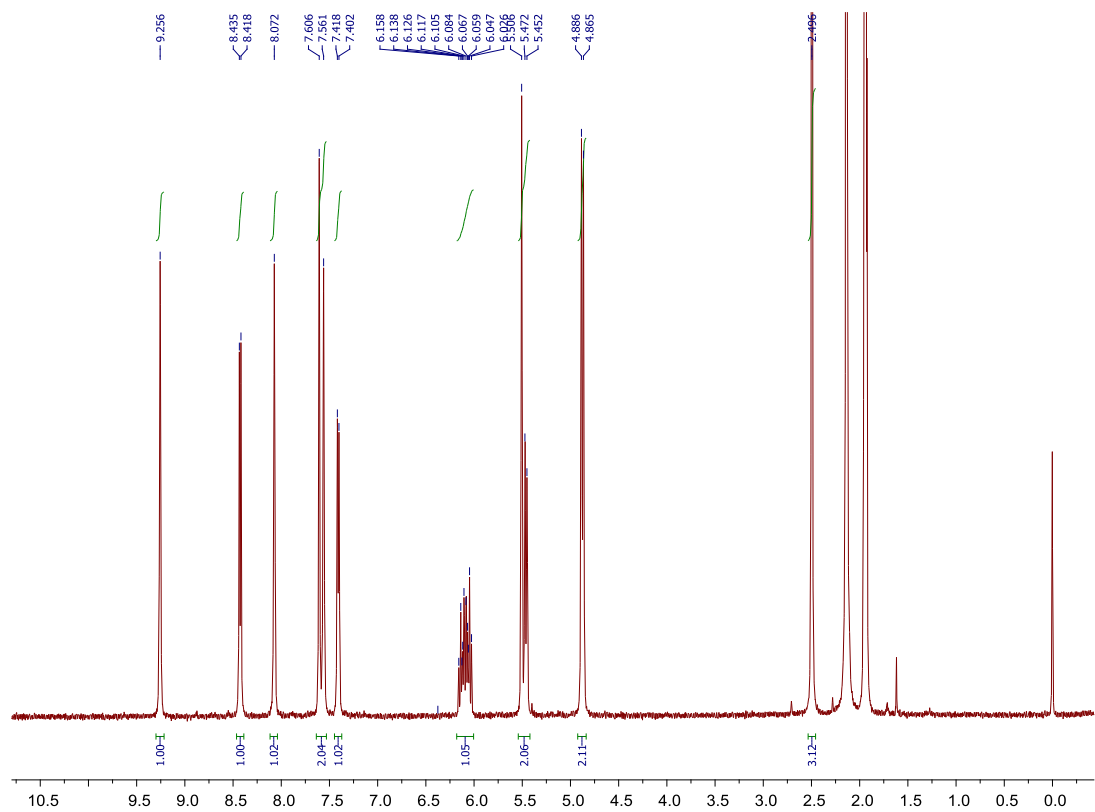

Figure 4.  $^1\text{H}$  NMR spectrum of 1-allyl-3-(2-(4-methyl)pyridyl)imidazolium hexafluorophosphate (**2b**).

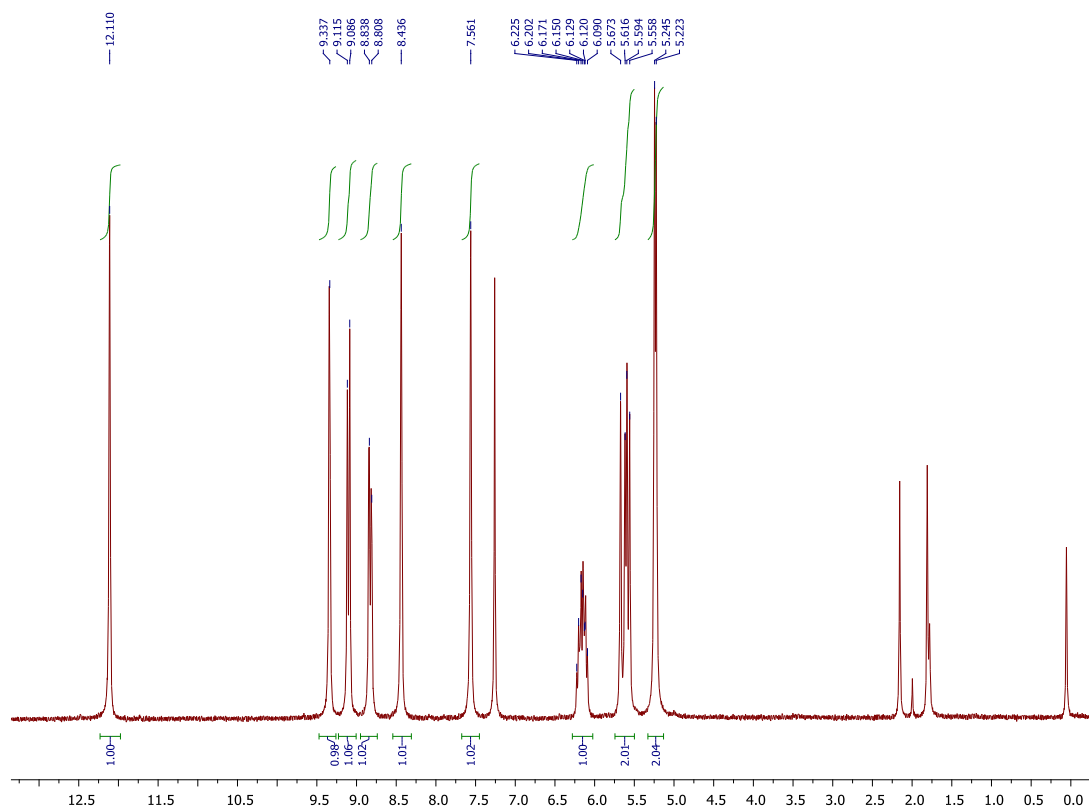

Figure 5.  $^1\text{H}$  NMR spectrum of 1-allyl-3-(2-(5-nitro)pyridyl)imidazolium bromide (**1c**).

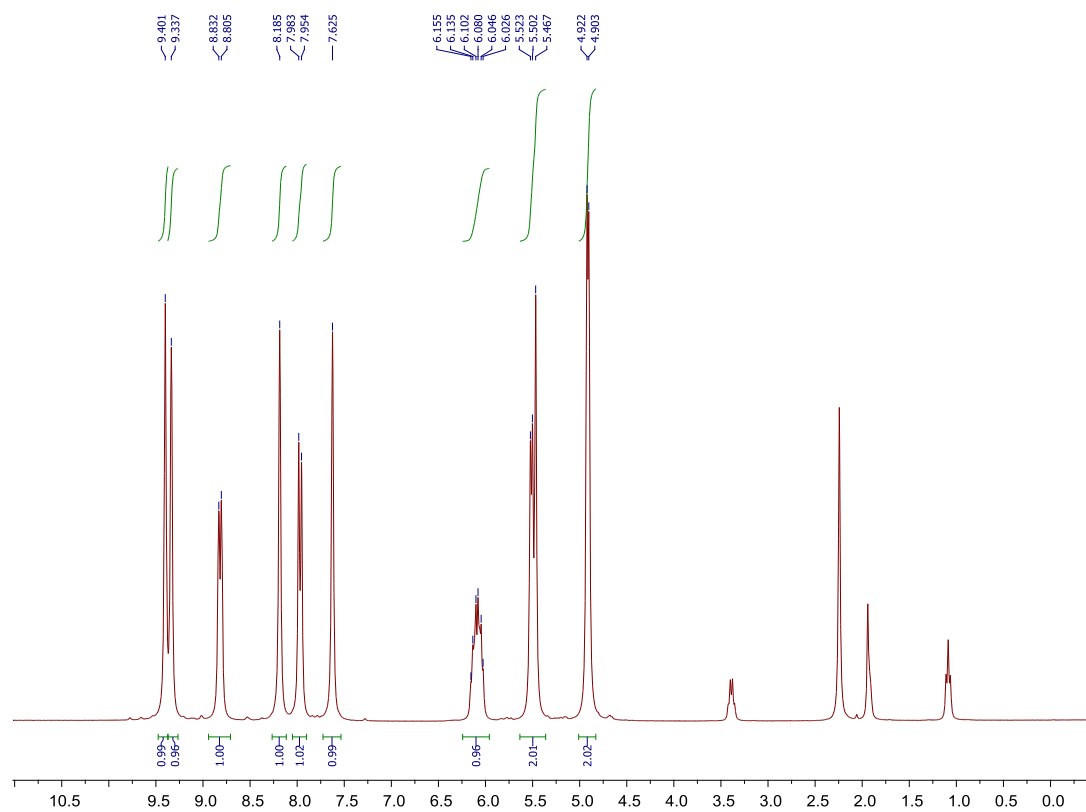

Figure 6.  $^1\text{H}$  NMR spectrum of 1-allyl-3-(2-(5-nitro)pyridyl)imidazolium hexafluorophosphate (**2c**).

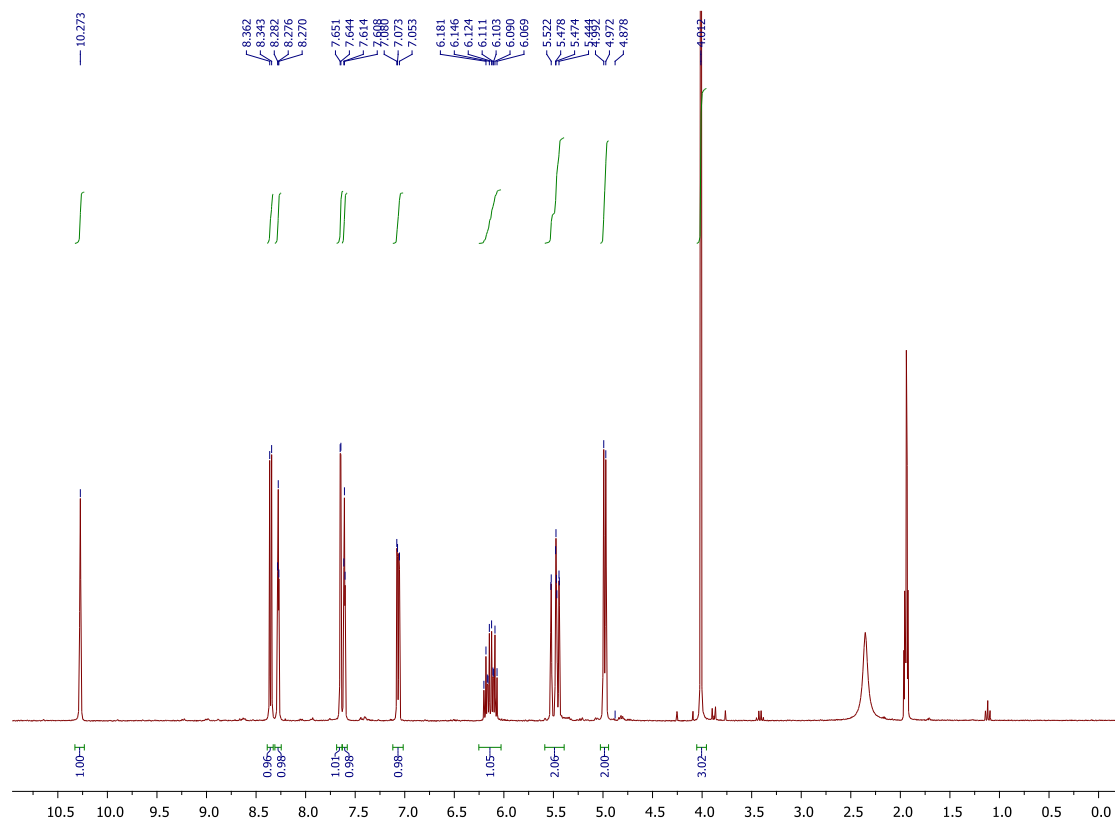

Figure 7.  $^1\text{H}$  NMR spectrum of 1-allyl-3-(2-(4-methoxy)pyridyl)imidazolium bromide (**1d**).

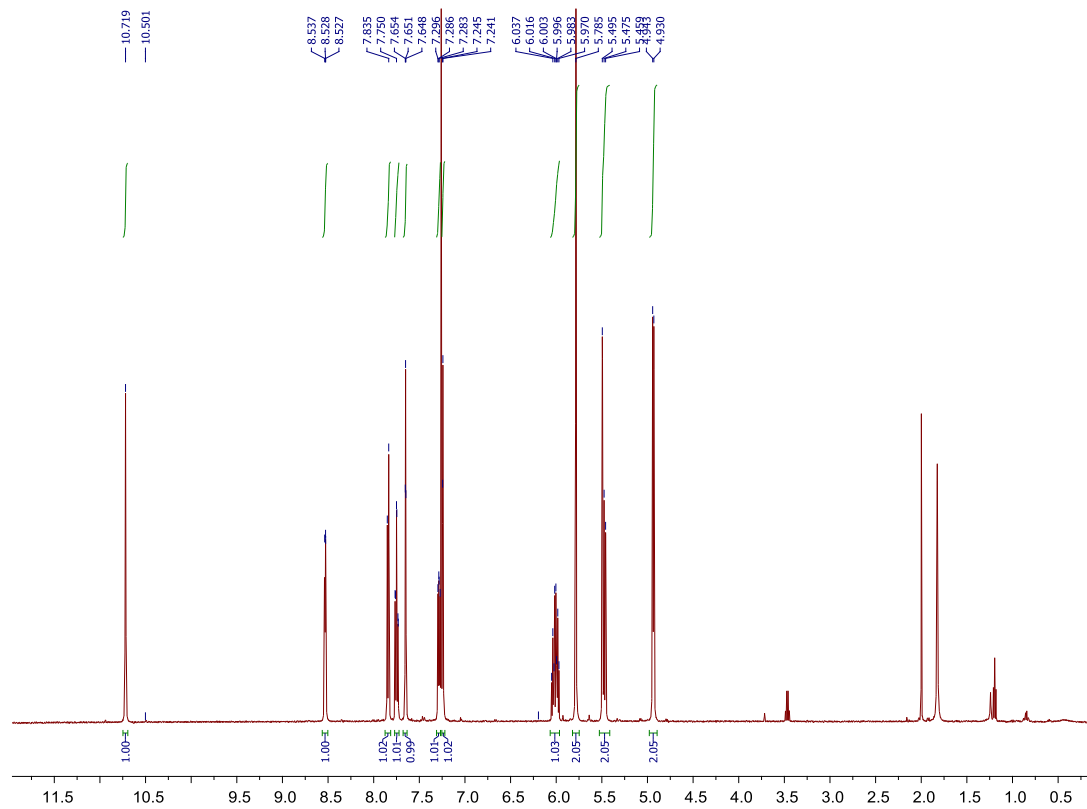

Figure 8.  $^1\text{H}$  NMR spectrum of 1-allyl-3-(2-methylpyridyl)imidazolium bromide (**1e**).

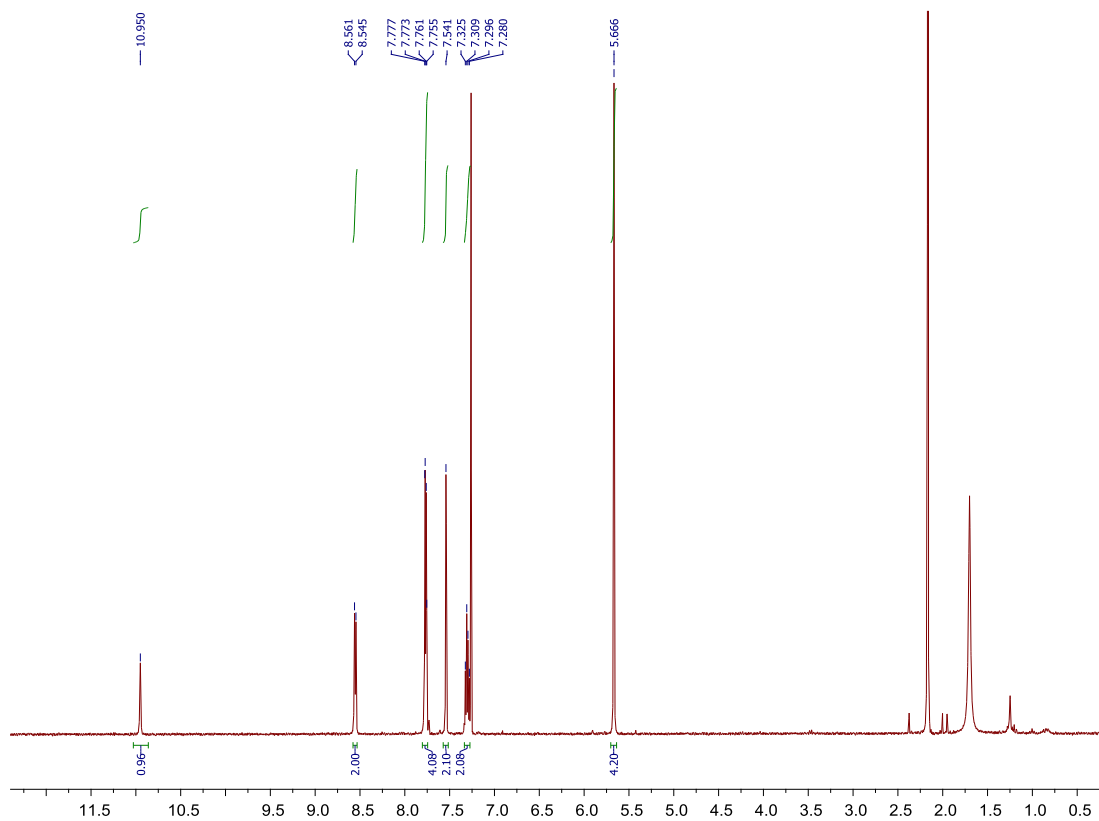

Figure 9.  $^1\text{H}$  NMR spectrum of 1,3-bis(2-methylpyridyl)imidazolium bromide (**1f**).

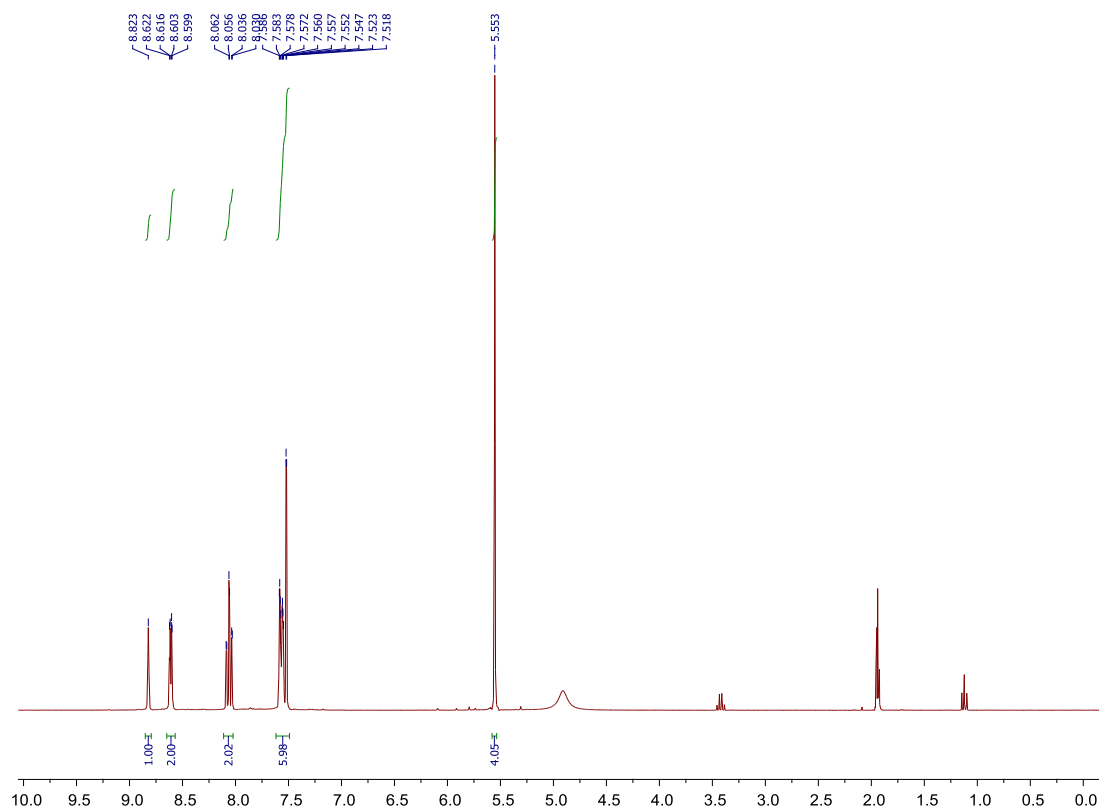

Figure 10.  $^1\text{H}$  NMR spectrum of 1,3-bis(2-methylpyridyl)imidazolium hexafluorophosphate (**2f**).

## 5. Ligand exchange studies

5 mg of complexes **3a**, **3b** and **3c** were dissolved separately in 1 mL acetonitrile and subjected to ESI MS. Positive ions of [**3a**-Br]<sup>+</sup> 557.0109, [**3b**-Br]<sup>+</sup> 585.0401 and [**3c**-Br]<sup>+</sup> 646.9797 were observed. Three further acetonitrile solutions were made up of **3a+3b**, **3a+3c** and **3b+3c** (5mg each complex in 1mL) and allowed to stand for 5 minutes. ESI MS showed ions of only the starting complexes, with no ligand scrambling observed.

## 5. Crystallographic Details

X-ray diffraction data were collected on either a Bruker Nonius X8 diffractometer fitted with an Apex II detector with Mo-K $\alpha$  radiation ( $\lambda = 0.71073 \text{ \AA}$ ), or an Agilent SuperNova diffractometer fitted with an Atlas CCD detector with Mo-K $\alpha$  radiation ( $\lambda = 0.71073 \text{ \AA}$ ) or Cu- K $\alpha$  radiation ( $\lambda = 1.5418 \text{ \AA}$ ). Crystals were mounted under oil on nylon fibres. Data sets were corrected for absorption using a multiscan method, and the structures were solved by direct methods using SHELXS-97 and refined by full-matrix least squares on F2 using ShelXL-97, interfaced through the program Olex2.<sup>7</sup> Molecular graphics for all structures were generated using POV-RAY in the X-Seed program.

### Crystallographic details for 1f:

|                                       |                                                   |
|---------------------------------------|---------------------------------------------------|
| Identification code                   | mrc029                                            |
| Empirical formula                     | C <sub>15</sub> H <sub>15</sub> N <sub>4</sub> Br |
| Formula weight                        | 331.22                                            |
| Temperature/K                         | 99.99(10)                                         |
| Crystal system                        | monoclinic                                        |
| Space group                           | P2 <sub>1</sub>                                   |
| a/ $\text{\AA}$                       | 8.1157(2)                                         |
| b/ $\text{\AA}$                       | 16.6921(4)                                        |
| c/ $\text{\AA}$                       | 10.8193(3)                                        |
| $\alpha$ / $^\circ$                   | 90.00                                             |
| $\beta$ / $^\circ$                    | 98.625(3)                                         |
| $\gamma$ / $^\circ$                   | 90.00                                             |
| Volume/ $\text{\AA}^3$                | 1449.09(6)                                        |
| Z                                     | 4                                                 |
| $\rho_{\text{calc}}$ /cm <sup>3</sup> | 1.518                                             |
| $\mu$ /mm <sup>-1</sup>               | 2.832                                             |

|                                                  |                                                                        |
|--------------------------------------------------|------------------------------------------------------------------------|
| F(000)                                           | 672.0                                                                  |
| Crystal size/mm <sup>3</sup>                     | 0.44 × 0.23 × 0.18                                                     |
| Radiation                                        | Mo K $\alpha$ ( $\lambda$ = 0.71073)                                   |
| 2 $\theta$ range for data collection/ $^{\circ}$ | 5.88 to 57.4                                                           |
| Index ranges                                     | -10 $\leq$ h $\leq$ 10, -22 $\leq$ k $\leq$ 20, -14 $\leq$ l $\leq$ 14 |
| Reflections collected                            | 11471                                                                  |
| Independent reflections                          | 6309 [ $R_{\text{int}}$ = 0.0322, $R_{\text{sigma}}$ = 0.0524]         |
| Data/restraints/parameters                       | 6309/1/362                                                             |
| Goodness-of-fit on F <sup>2</sup>                | 1.054                                                                  |
| Final R indexes [ $I \geq 2\sigma(I)$ ]          | $R_1$ = 0.0363, $wR_2$ = 0.0765                                        |
| Final R indexes [all data]                       | $R_1$ = 0.0417, $wR_2$ = 0.0790                                        |
| Largest diff. peak/hole / e $\text{\AA}^{-3}$    | 1.83/-0.48                                                             |
| Flack parameter                                  | 0.377(8)                                                               |

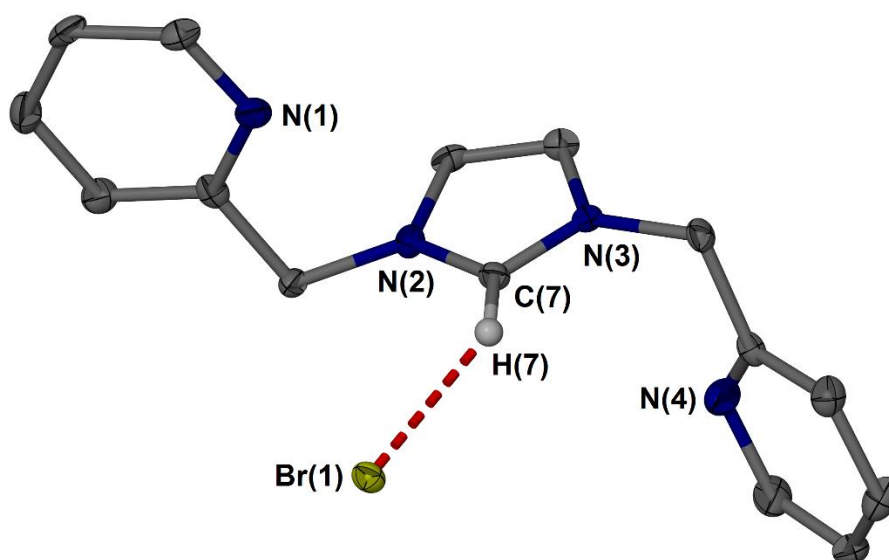

Figure 11. Molecular structure of **1f**.

#### Crystallographic details for **3a**:

|                     |                                                                                                |
|---------------------|------------------------------------------------------------------------------------------------|
| Identification code | brml290                                                                                        |
| Empirical formula   | C <sub>46</sub> H <sub>52</sub> N <sub>12</sub> O <sub>2</sub> Pd <sub>2</sub> Br <sub>4</sub> |
| Formula weight      | 668.70                                                                                         |
| Temperature/K       | 100.15                                                                                         |
| Crystal system      | monoclinic                                                                                     |
| Space group         | P2 <sub>1</sub> /c                                                                             |
| a/ $\text{\AA}$     | 23.0939(12)                                                                                    |
| b/ $\text{\AA}$     | 9.6206(5)                                                                                      |

|                                               |                                                                    |
|-----------------------------------------------|--------------------------------------------------------------------|
| $c/\text{\AA}$                                | 25.3916(11)                                                        |
| $\alpha/^\circ$                               | 90.00                                                              |
| $\beta/^\circ$                                | 112.426(5)                                                         |
| $\gamma/^\circ$                               | 90.00                                                              |
| Volume/ $\text{\AA}^3$                        | 5214.8(4)                                                          |
| Z                                             | 4                                                                  |
| $\rho_{\text{calc}}/\text{g/cm}^3$            | 1.704                                                              |
| $\mu/\text{mm}^{-1}$                          | 9.546                                                              |
| F(000)                                        | 2640.0                                                             |
| Crystal size/ $\text{mm}^3$                   | $0.06 \times 0.04 \times 0.02$                                     |
| Radiation                                     | Cu K $\alpha$ ( $\lambda = 1.54184$ )                              |
| $2\theta$ range for data collection/ $^\circ$ | 7.08 to 133.2                                                      |
| Index ranges                                  | $-26 \leq h \leq 19$ , $-11 \leq k \leq 11$ , $-30 \leq l \leq 30$ |
| Reflections collected                         | 26524                                                              |
| Independent reflections                       | 8977 [ $R_{\text{int}} = 0.1150$ , $R_{\text{sigma}} = 0.1203$ ]   |
| Data/restraints/parameters                    | 8977/0/600                                                         |
| Goodness-of-fit on $F^2$                      | 1.003                                                              |
| Final R indexes [ $I \geq 2\sigma(I)$ ]       | $R_1 = 0.0583$ , $wR_2 = 0.1148$                                   |
| Final R indexes [all data]                    | $R_1 = 0.1350$ , $wR_2 = 0.1479$                                   |
| Largest diff. peak/hole / $e \text{\AA}^{-3}$ | 1.14/-0.98                                                         |

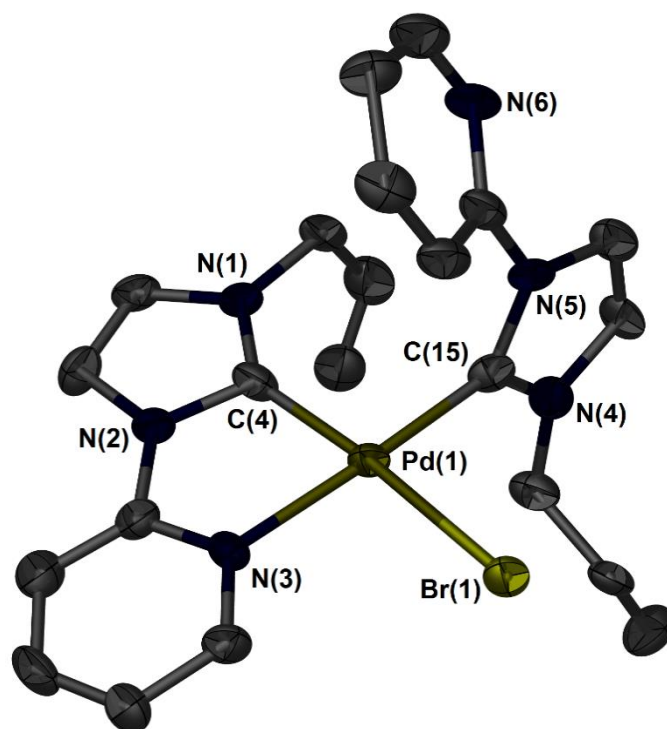

Figure 12. Molecular structure of **3a**.

### Crystallographic details for 3c:

|                                                |                                                               |
|------------------------------------------------|---------------------------------------------------------------|
| Identification code                            | BRML285                                                       |
| Empirical formula                              | $C_{22.5}H_{22}N_8O_{4.5}Br_2Pd$                              |
| Formula weight                                 | 1485.36                                                       |
| Temperature/K                                  | 100.15                                                        |
| Crystal system                                 | monoclinic                                                    |
| Space group                                    | $P2_1/n$                                                      |
| a/Å                                            | 7.3047(9)                                                     |
| b/Å                                            | 11.7658(11)                                                   |
| c/Å                                            | 31.200(3)                                                     |
| $\alpha/^\circ$                                | 90.00                                                         |
| $\beta/^\circ$                                 | 92.115(10)                                                    |
| $\gamma/^\circ$                                | 90.00                                                         |
| Volume/Å <sup>3</sup>                          | 2679.7(5)                                                     |
| Z                                              | 4                                                             |
| $\rho_{\text{calc}}/\text{g/cm}^3$             | 1.841                                                         |
| $\mu/\text{mm}^{-1}$                           | 3.722                                                         |
| F(000)                                         | 1460.0                                                        |
| Crystal size/mm <sup>3</sup>                   | 0.16 × 0.04 × 0.02                                            |
| Radiation                                      | Mo K $\alpha$ ( $\lambda = 0.71073$ )                         |
| 2 $\Theta$ range for data collection/ $^\circ$ | 6.26 to 50.12                                                 |
| Index ranges                                   | $-8 \leq h \leq 8, -12 \leq k \leq 14, -37 \leq l \leq 33$    |
| Reflections collected                          | 11046                                                         |
| Independent reflections                        | 4707 [ $R_{\text{int}} = 0.0951, R_{\text{sigma}} = 0.1411$ ] |
| Data/restraints/parameters                     | 4707/0/354                                                    |
| Goodness-of-fit on F <sup>2</sup>              | 1.020                                                         |
| Final R indexes [ $I \geq 2\sigma(I)$ ]        | $R_1 = 0.0678, wR_2 = 0.1184$                                 |
| Final R indexes [all data]                     | $R_1 = 0.1272, wR_2 = 0.1364$                                 |
| Largest diff. peak/hole / e Å <sup>-3</sup>    | 1.50/-0.96                                                    |



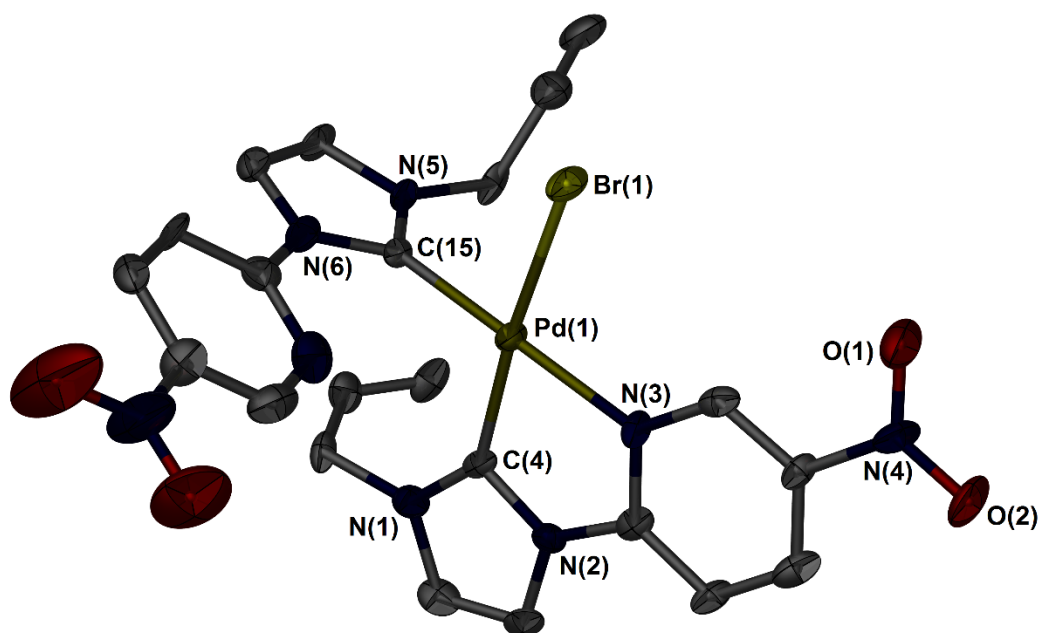

Figure 13. Molecular structure of **3c**.

**Crystallographic details for 4b:**

|                                    |                                                                   |
|------------------------------------|-------------------------------------------------------------------|
| Identification code                | MRC125_Mo_a                                                       |
| Empirical formula                  | C <sub>12</sub> H <sub>13</sub> Br <sub>2</sub> N <sub>3</sub> Pd |
| Formula weight                     | 465.47                                                            |
| Temperature/K                      | 120.0(2)                                                          |
| Crystal system                     | triclinic                                                         |
| Space group                        | P-1                                                               |
| a/Å                                | 7.9713(7)                                                         |
| b/Å                                | 9.1926(8)                                                         |
| c/Å                                | 9.8150(4)                                                         |
| α/°                                | 80.496(5)                                                         |
| β/°                                | 79.638(6)                                                         |
| γ/°                                | 87.116(7)                                                         |
| Volume/Å <sup>3</sup>              | 697.61(9)                                                         |
| Z                                  | 2                                                                 |
| ρ <sub>calc</sub> /cm <sup>3</sup> | 2.216                                                             |
| μ/mm <sup>-1</sup>                 | 7.043                                                             |
| F(000)                             | 444.0                                                             |
| Crystal size/mm <sup>3</sup>       | 0.09 × 0.05 × 0.04                                                |
| Radiation                          | MoKα (λ = 0.71073)                                                |
| 2θ range for data collection/°     | 6.12 to 56.56                                                     |

|                                             |                                                               |
|---------------------------------------------|---------------------------------------------------------------|
| Index ranges                                | -10 ≤ h ≤ 10, -12 ≤ k ≤ 12, -13 ≤ l ≤ 12                      |
| Reflections collected                       | 14130                                                         |
| Independent reflections                     | 3472 [R <sub>int</sub> = 0.0413, R <sub>sigma</sub> = 0.0366] |
| Data/restraints/parameters                  | 3472/0/164                                                    |
| Goodness-of-fit on F <sup>2</sup>           | 1.029                                                         |
| Final R indexes [I ≥ 2σ(I)]                 | R <sub>1</sub> = 0.0330, wR <sub>2</sub> = 0.0732             |
| Final R indexes [all data]                  | R <sub>1</sub> = 0.0435, wR <sub>2</sub> = 0.0778             |
| Largest diff. peak/hole / e Å <sup>-3</sup> | 0.99/-1.02                                                    |

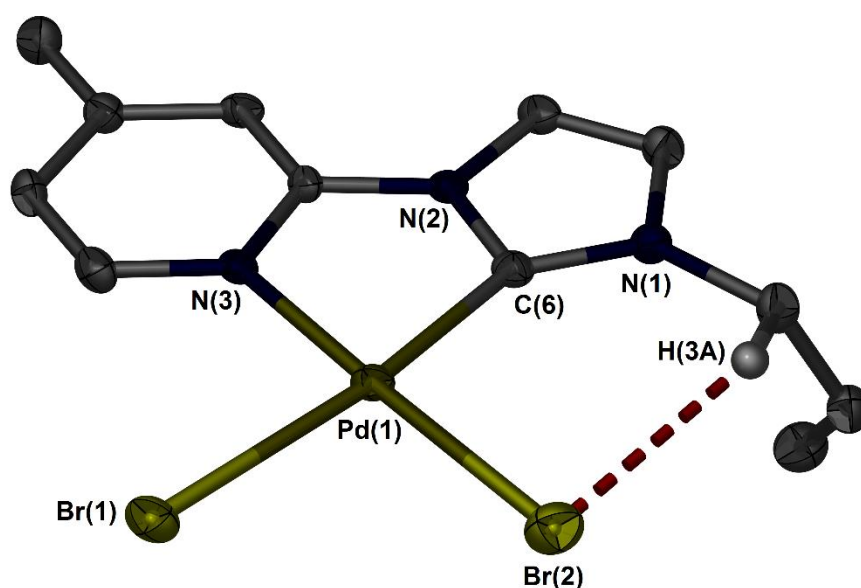

Figure 14. Molecular structure of **4b**.

#### Crystallographic details for **4d**:

|                     |                                                                    |
|---------------------|--------------------------------------------------------------------|
| Identification code | MRC99_Mo                                                           |
| Empirical formula   | C <sub>12</sub> H <sub>13</sub> Br <sub>2</sub> N <sub>3</sub> OPd |
| Formula weight      | 481.47                                                             |
| Temperature/K       | 120.01(11)                                                         |
| Crystal system      | monoclinic                                                         |
| Space group         | P2 <sub>1</sub> /n                                                 |
| a/Å                 | 13.5090(8)                                                         |
| b/Å                 | 7.9393(3)                                                          |
| c/Å                 | 13.9341(9)                                                         |
| α/°                 | 90.00                                                              |
| β/°                 | 108.376(6)                                                         |
| γ/°                 | 90.00                                                              |

|                                             |                                                                |
|---------------------------------------------|----------------------------------------------------------------|
| Volume/Å <sup>3</sup>                       | 1418.25(14)                                                    |
| Z                                           | 4                                                              |
| $\rho_{\text{calc}}$ /mg/mm <sup>3</sup>    | 2.255                                                          |
| m/mm <sup>-1</sup>                          | 6.937                                                          |
| F(000)                                      | 920.0                                                          |
| Crystal size/mm <sup>3</sup>                | 0.13 × 0.09 × 0.04                                             |
| Radiation                                   | MoK $\alpha$ ( $\lambda$ = 0.71073)                            |
| 2 $\Theta$ range for data collection        | 6.3 to 52.74°                                                  |
| Index ranges                                | -16 ≤ h ≤ 14, -8 ≤ k ≤ 9, -17 ≤ l ≤ 17                         |
| Reflections collected                       | 8045                                                           |
| Independent reflections                     | 2885 [ $R_{\text{int}}$ = 0.0658, $R_{\text{sigma}}$ = 0.0789] |
| Data/restraints/parameters                  | 2885/0/173                                                     |
| Goodness-of-fit on F <sup>2</sup>           | 1.039                                                          |
| Final R indexes [ $I \geq 2\sigma(I)$ ]     | $R_1$ = 0.0569, $wR_2$ = 0.1154                                |
| Final R indexes [all data]                  | $R_1$ = 0.0828, $wR_2$ = 0.1280                                |
| Largest diff. peak/hole / e Å <sup>-3</sup> | 1.45/-1.11                                                     |

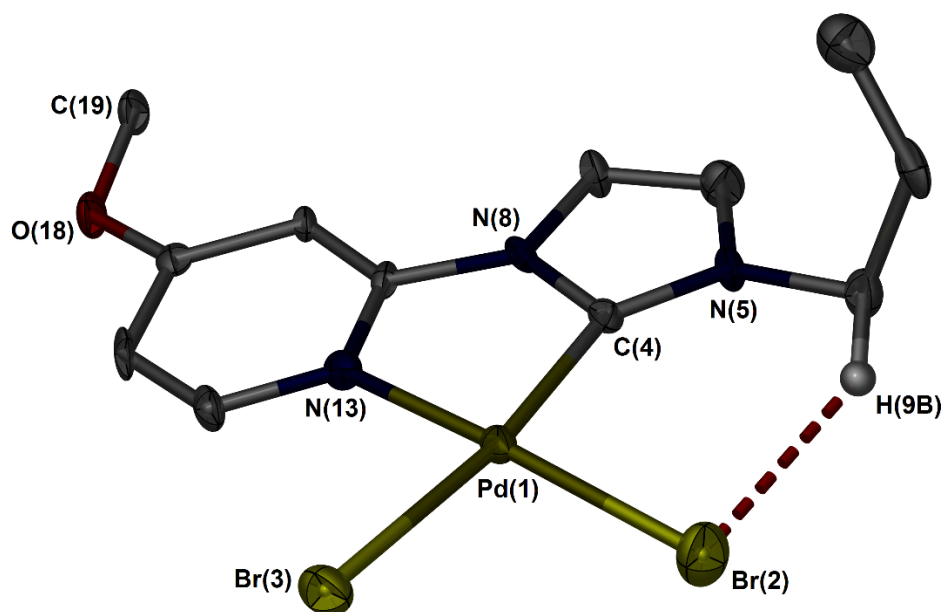

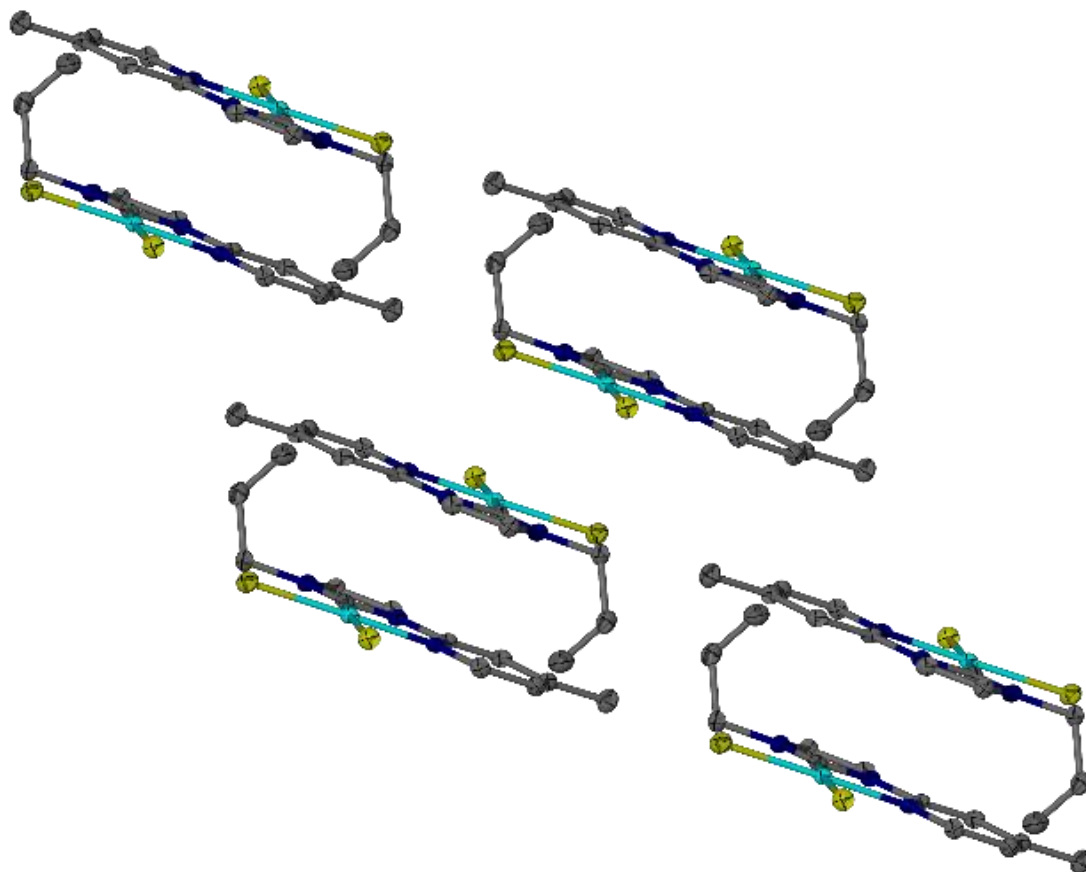

Figure 15. Molecular structure of **4d** and extended packing structure of **4d**, running along the crystallographic b axis.

**Crystallographic details for 5c:**

|                       |                                 |
|-----------------------|---------------------------------|
| Identification code   | MRC118_171114_Mo                |
| Empirical formula     | $C_{24}H_{23}F_{12}N_9O_4P_2Pd$ |
| Formula weight        | 897.85                          |
| Temperature/K         | 120.00(13)                      |
| Crystal system        | monoclinic                      |
| Space group           | $P2_1/c$                        |
| a/Å                   | 11.9415(9)                      |
| b/Å                   | 16.7247(9)                      |
| c/Å                   | 16.7259(10)                     |
| $\alpha/^\circ$       | 90.00                           |
| $\beta/^\circ$        | 102.857(6)                      |
| $\gamma/^\circ$       | 90.00                           |
| Volume/Å <sup>3</sup> | 3256.7(4)                       |
| Z                     | 4                               |

|                                                |                                                               |
|------------------------------------------------|---------------------------------------------------------------|
| $\rho_{\text{calc}}/\text{cm}^3$               | 1.831                                                         |
| $\mu/\text{mm}^{-1}$                           | 0.785                                                         |
| F(000)                                         | 1784.0                                                        |
| Crystal size/ $\text{mm}^3$                    | $0.17 \times 0.13 \times 0.05$                                |
| Radiation                                      | MoK $\alpha$ ( $\lambda = 0.71073$ )                          |
| 2 $\theta$ range for data collection/ $^\circ$ | 6.2 to 56.56                                                  |
| Index ranges                                   | $-15 \leq h \leq 13, -19 \leq k \leq 22, -21 \leq l \leq 22$  |
| Reflections collected                          | 23620                                                         |
| Independent reflections                        | 8072 [ $R_{\text{int}} = 0.0539, R_{\text{sigma}} = 0.0665$ ] |
| Data/restraints/parameters                     | 8072/0/470                                                    |
| Goodness-of-fit on $F^2$                       | 1.043                                                         |
| Final R indexes [ $I \geq 2\sigma(I)$ ]        | $R_1 = 0.0432, wR_2 = 0.0765$                                 |
| Final R indexes [all data]                     | $R_1 = 0.0711, wR_2 = 0.0873$                                 |
| Largest diff. peak/hole / $e \text{ \AA}^{-3}$ | 0.54/-0.63                                                    |

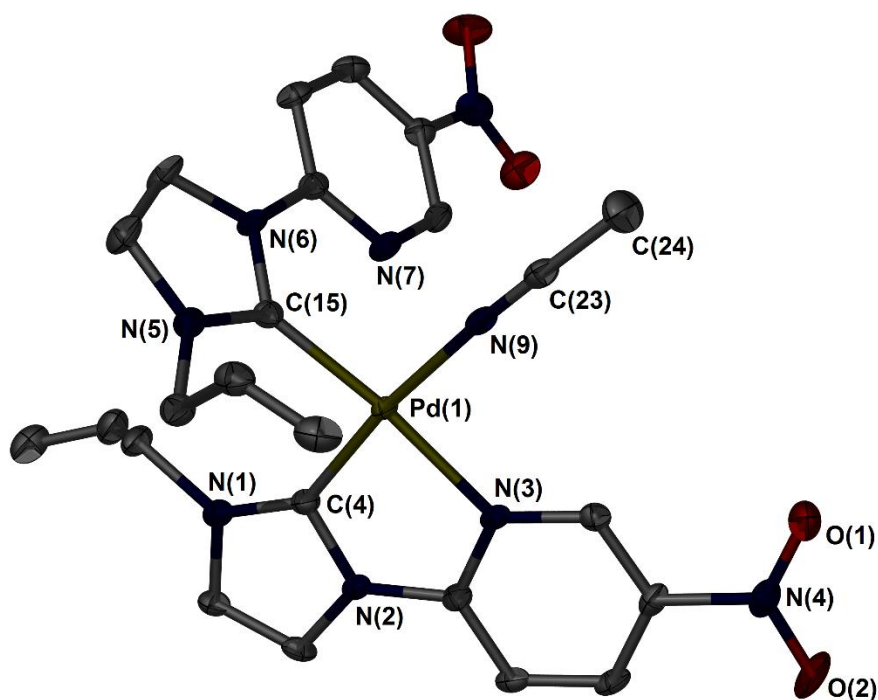

Figure 16. Molecular structure of **5c**.

#### Crystallographic details for **5d**:

|                     |                                                                                  |
|---------------------|----------------------------------------------------------------------------------|
| Identification code | MRC090a                                                                          |
| Empirical formula   | $\text{C}_{26}\text{H}_{29}\text{N}_7\text{O}_2\text{F}_{12}\text{P}_2\text{Pd}$ |
| Formula weight      | 867.90                                                                           |
| Temperature/K       | 100.0(5)                                                                         |

|                                             |                                                               |
|---------------------------------------------|---------------------------------------------------------------|
| Crystal system                              | monoclinic                                                    |
| Space group                                 | P2 <sub>1</sub> /c                                            |
| a/Å                                         | 17.4973(8)                                                    |
| b/Å                                         | 9.5790(5)                                                     |
| c/Å                                         | 20.1652(10)                                                   |
| α/°                                         | 90.00                                                         |
| β/°                                         | 98.859(4)                                                     |
| γ/°                                         | 90.00                                                         |
| Volume/Å <sup>3</sup>                       | 3339.5(3)                                                     |
| Z                                           | 4                                                             |
| ρ <sub>calc</sub> /cm <sup>3</sup>          | 1.726                                                         |
| μ/mm <sup>-1</sup>                          | 0.757                                                         |
| F(000)                                      | 1736.0                                                        |
| Crystal size/mm <sup>3</sup>                | 0.31 × 0.24 × 0.11                                            |
| Radiation                                   | MoKα (λ = 0.71073)                                            |
| 2θ range for data collection/°              | 6.58 to 56.56                                                 |
| Index ranges                                | -23 ≤ h ≤ 13, -12 ≤ k ≤ 12, -26 ≤ l ≤ 26                      |
| Reflections collected                       | 15136                                                         |
| Independent reflections                     | 8234 [R <sub>int</sub> = 0.0421, R <sub>sigma</sub> = 0.0721] |
| Data/restraints/parameters                  | 8234/0/454                                                    |
| Goodness-of-fit on F <sup>2</sup>           | 1.030                                                         |
| Final R indexes [I ≥ 2σ(I)]                 | R <sub>1</sub> = 0.0572, wR <sub>2</sub> = 0.1242             |
| Final R indexes [all data]                  | R <sub>1</sub> = 0.0775, wR <sub>2</sub> = 0.1374             |
| Largest diff. peak/hole / e Å <sup>-3</sup> | 2.99/-1.04                                                    |

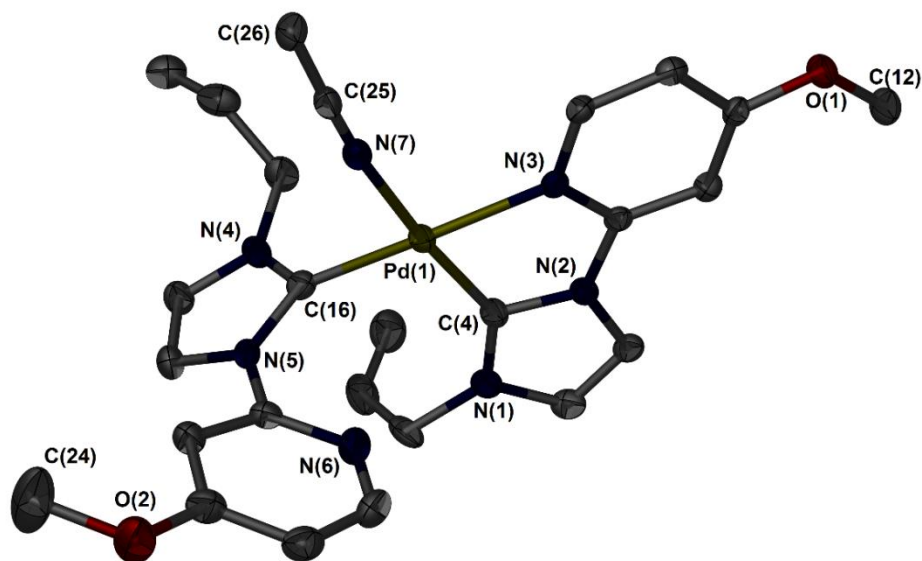

Figure 17. Molecular structure of **5d**.

**Crystallographic details for 6f:**

|                                             |                                                                     |
|---------------------------------------------|---------------------------------------------------------------------|
| Identification code                         | MRC147_Mo                                                           |
| Empirical formula                           | C <sub>32</sub> H <sub>32</sub> Br <sub>2</sub> N <sub>8</sub> OPdS |
| Formula weight                              | 842.94                                                              |
| Temperature/K                               | 120.0(2)                                                            |
| Crystal system                              | monoclinic                                                          |
| Space group                                 | C2/c                                                                |
| a/Å                                         | 30.370(4)                                                           |
| b/Å                                         | 12.2010(19)                                                         |
| c/Å                                         | 18.606(2)                                                           |
| α/°                                         | 90.00                                                               |
| β/°                                         | 107.066(14)                                                         |
| γ/°                                         | 90.00                                                               |
| Volume/Å <sup>3</sup>                       | 6590.9(16)                                                          |
| Z                                           | 8                                                                   |
| ρ <sub>calc</sub> /cm <sup>3</sup>          | 1.699                                                               |
| μ/mm <sup>-1</sup>                          | 3.091                                                               |
| F(000)                                      | 3360.0                                                              |
| Crystal size/mm <sup>3</sup>                | 0.21 × 0.05 × 0.04                                                  |
| Radiation                                   | MoKα (λ = 0.71073)                                                  |
| 2θ range for data collection/°              | 5.5 to 56.56                                                        |
| Index ranges                                | -40 ≤ h ≤ 39, -16 ≤ k ≤ 15, -24 ≤ l ≤ 24                            |
| Reflections collected                       | 23167                                                               |
| Independent reflections                     | 8170 [R <sub>int</sub> = 0.0876, R <sub>sigma</sub> = 0.1187]       |
| Data/restraints/parameters                  | 8170/0/403                                                          |
| Goodness-of-fit on F <sup>2</sup>           | 1.017                                                               |
| Final R indexes [I ≥ 2σ (I)]                | R <sub>1</sub> = 0.0803, wR <sub>2</sub> = 0.1602                   |
| Final R indexes [all data]                  | R <sub>1</sub> = 0.1442, wR <sub>2</sub> = 0.1898                   |
| Largest diff. peak/hole / e Å <sup>-3</sup> | 1.46/-2.79                                                          |

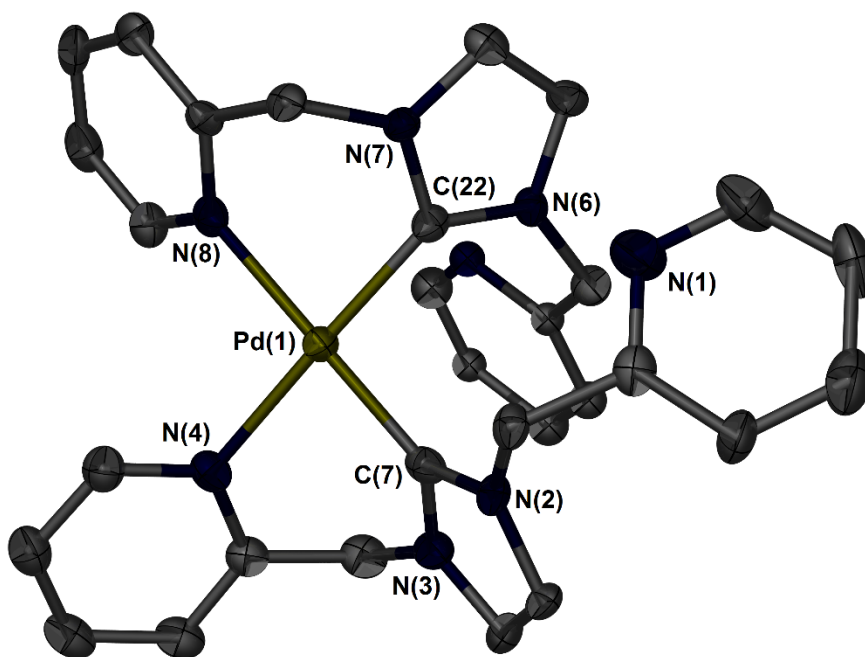

Figure 18. Molecular structure of **6f**.

#### Crystallographic details for **7e**:

|                                    |                                                                                  |
|------------------------------------|----------------------------------------------------------------------------------|
| Identification code                | mrc055                                                                           |
| Empirical formula                  | C <sub>24</sub> H <sub>26</sub> N <sub>6</sub> F <sub>12</sub> P <sub>2</sub> Pd |
| Formula weight                     | 794.85                                                                           |
| Temperature/K                      | 99.9(4)                                                                          |
| Crystal system                     | triclinic                                                                        |
| Space group                        | P-1                                                                              |
| a/Å                                | 8.1012(3)                                                                        |
| b/Å                                | 10.9063(4)                                                                       |
| c/Å                                | 16.9064(7)                                                                       |
| α/°                                | 96.373(3)                                                                        |
| β/°                                | 98.659(3)                                                                        |
| γ/°                                | 97.265(3)                                                                        |
| Volume/Å <sup>3</sup>              | 1451.93(10)                                                                      |
| Z                                  | 2                                                                                |
| ρ <sub>calc</sub> /cm <sup>3</sup> | 1.818                                                                            |
| μ/mm <sup>-1</sup>                 | 0.855                                                                            |
| F(000)                             | 792.0                                                                            |
| Crystal size/mm <sup>3</sup>       | 0.11 × 0.07 × 0.03                                                               |
| Radiation                          | MoKα (λ = 0.71073)                                                               |
| 2θ range for data collection/°     | 5.8 to 56.56                                                                     |



|                                                |                                                               |
|------------------------------------------------|---------------------------------------------------------------|
| Index ranges                                   | $-10 \leq h \leq 10, -13 \leq k \leq 14, -22 \leq l \leq 21$  |
| Reflections collected                          | 14671                                                         |
| Independent reflections                        | 7152 [ $R_{\text{int}} = 0.0318, R_{\text{sigma}} = 0.0555$ ] |
| Data/restraints/parameters                     | 7152/0/406                                                    |
| Goodness-of-fit on $F^2$                       | 1.047                                                         |
| Final R indexes [ $I \geq 2\sigma(I)$ ]        | $R_1 = 0.0403, wR_2 = 0.0835$                                 |
| Final R indexes [all data]                     | $R_1 = 0.0521, wR_2 = 0.0896$                                 |
| Largest diff. peak/hole / $e \text{ \AA}^{-3}$ | 1.14/-0.79                                                    |

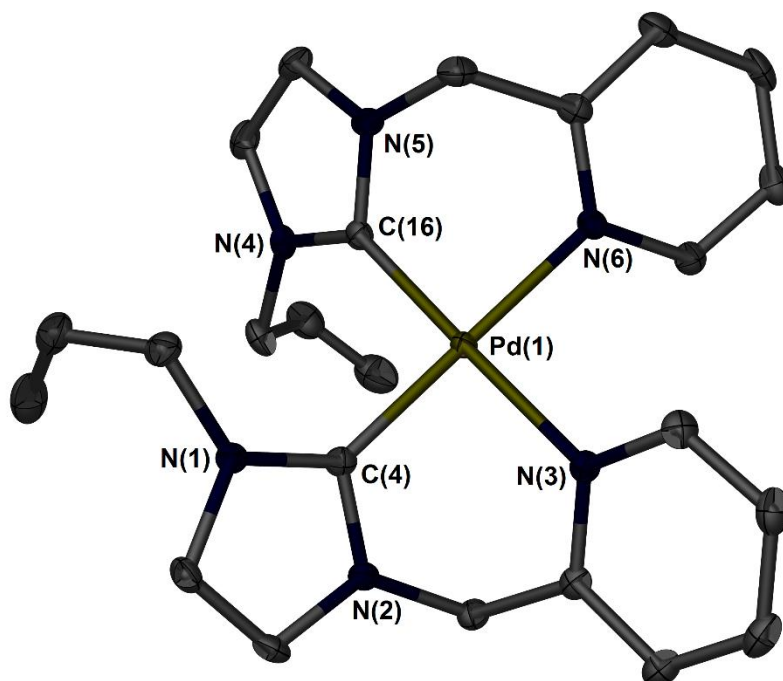

Figure 19. Molecular structure of **7e**.

#### Crystallographic details for **7f**:

|                     |                              |
|---------------------|------------------------------|
| Identification code | MRC100_Mo                    |
| Empirical formula   | $C_{30}H_{28}F_{12}N_8P_2Pd$ |
| Formula weight      | 896.94                       |
| Temperature/K       | 119.99(13)                   |
| Crystal system      | monoclinic                   |
| Space group         | $P2_1/c$                     |
| $a/\text{\AA}$      | 8.0821(4)                    |
| $b/\text{\AA}$      | 20.5140(10)                  |
| $c/\text{\AA}$      | 20.6555(9)                   |
| $\alpha/^\circ$     | 90.00                        |

|                                               |                                                               |
|-----------------------------------------------|---------------------------------------------------------------|
| $\beta/^\circ$                                | 96.704(4)                                                     |
| $\gamma/^\circ$                               | 90.00                                                         |
| Volume/ $\text{\AA}^3$                        | 3401.2(3)                                                     |
| Z                                             | 4                                                             |
| $\rho_{\text{calc}}/\text{g/cm}^3$            | 1.752                                                         |
| $\mu/\text{mm}^{-1}$                          | 0.743                                                         |
| F(000)                                        | 1792.0                                                        |
| Crystal size/ $\text{mm}^3$                   | $0.11 \times 0.04 \times 0.03$                                |
| Radiation                                     | MoK $\alpha$ ( $\lambda = 0.71073$ )                          |
| $2\Theta$ range for data collection/ $^\circ$ | 5.44 to 56.56                                                 |
| Index ranges                                  | $-10 \leq h \leq 10, -26 \leq k \leq 27, -27 \leq l \leq 27$  |
| Reflections collected                         | 31660                                                         |
| Independent reflections                       | 8440 [ $R_{\text{int}} = 0.0892, R_{\text{sigma}} = 0.1003$ ] |
| Data/restraints/parameters                    | 8440/16/474                                                   |
| Goodness-of-fit on $F^2$                      | 1.041                                                         |
| Final R indexes [ $I \geq 2\sigma(I)$ ]       | $R_1 = 0.0731, wR_2 = 0.1314$                                 |
| Final R indexes [all data]                    | $R_1 = 0.1144, wR_2 = 0.1464$                                 |
| Largest diff. peak/hole / $e \text{\AA}^{-3}$ | 1.76/-0.78                                                    |

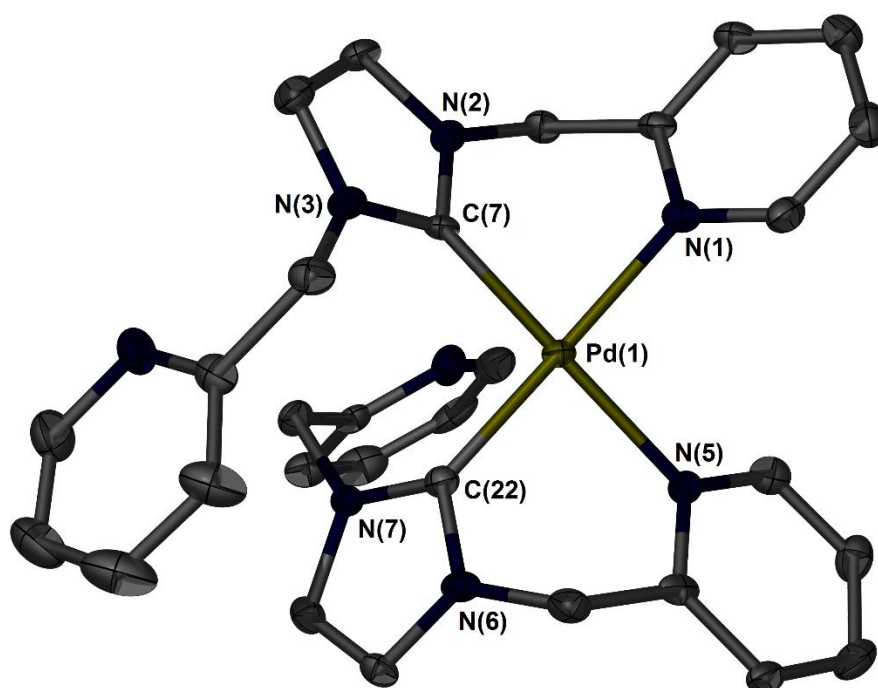

Figure 20. Molecular structure of **7f**.

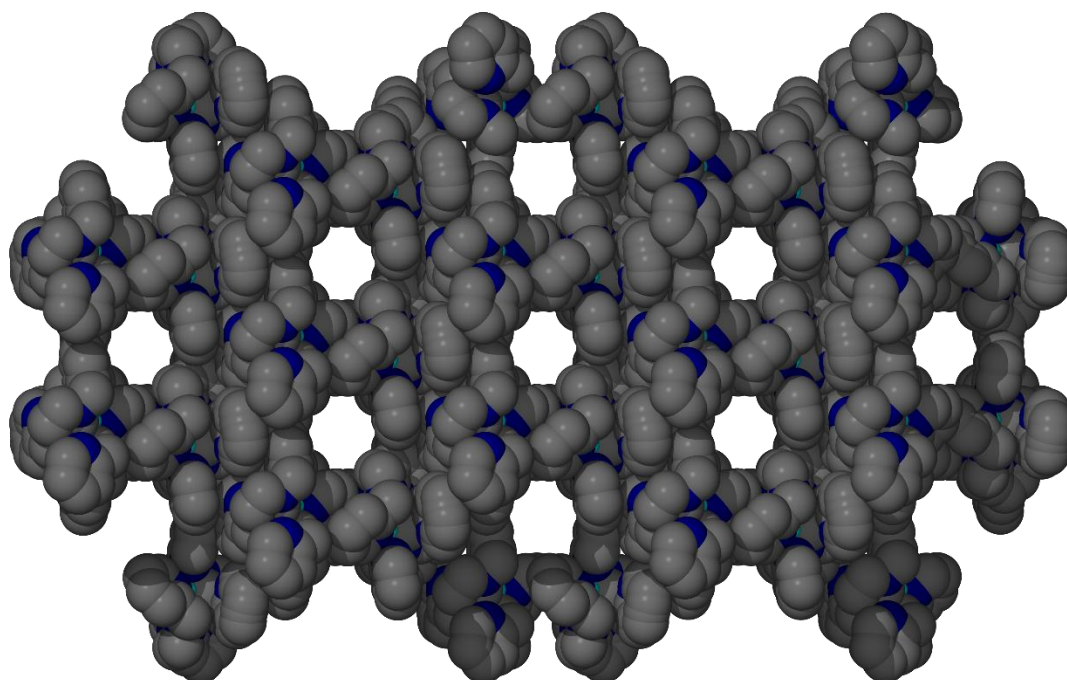

Figure 21. Packed structure of **7f**, illustrating extended network of solvent accessible channels.

## 6. References

1. Z. Xi, F. Liu, Y. Zhou, W. Chen, *Tetrahedron* **2008**, *64*, 4254-4259.
2. B. R. M. Lake, C. E. Willans, *Organometallics* **2014**, *33*, 2027-2038.
3. A. Raba, M. R. Anneser, D. Jantke, M. Cokoja, W. A. Herrmann, F. E. Kuhn, *Tetrahedron Lett.* **2013**, *54*, 3384-3387.
4. M. J. McPhillie, R. Trowbridge, K. R. Mariner, A. J. O'Neill, A. Peter Johnson, I. Chopra, C. W. G. Fishwick, *ACS Med. Chem. Lett.* **2011**, *2*, 729-734.
5. J. M. Keith, *J. Org. Chem.* **2008**, *73*, 327-330.
6. J. -R. Hu, L. -H. Liu, X. Hu, H. -D. Ye, *Tetrahedron* **2014**, *70*, 5815-5819.
7. O. V. Dolomanov, L. J. Bourhis, R. J. Gildea, J. A. K. Howard and H. Puschmann, *Journal of Applied Crystallography* **2009**, *42*, 339-341.
